# Supplementary material for: Wearable Natural Rubber Latex Gloves with Curcumin for Torn Glove Detection in Clinical Settings
Source: MDPI journal article supplement (doi:10.3390/polym14153048), 2022-07-28
Supplement: s1 [file s1]

## Supporting Information

### Wearable Natural Rubber Latex Gloves with Curcumin for Torn Glove Detection in Clinical Settings

Norfatirah Muhamad Sarih<sup>1</sup>, Nuur Syuhada Dzulkafly<sup>1</sup>, Simon Maher<sup>2</sup> and Azura A. Rashid<sup>1,\*</sup>

<sup>1</sup> School of Materials and Mineral Resources Engineering, Universiti Sains Malaysia, Engineering Campus, Nibong Tebal 14300, Penang, Malaysia; fatirahsarih@usm.my (N.M.S.); dn.syuhada@student.usm.my (N.S.D.)

<sup>2</sup> Department of Electrical Engineering and Electronics, University of Liverpool, Liverpool L69 3GJ, UK; s.maher@liverpool.ac.uk (S.M.)

\* Correspondence: srazura@usm.my (A.A.R.)

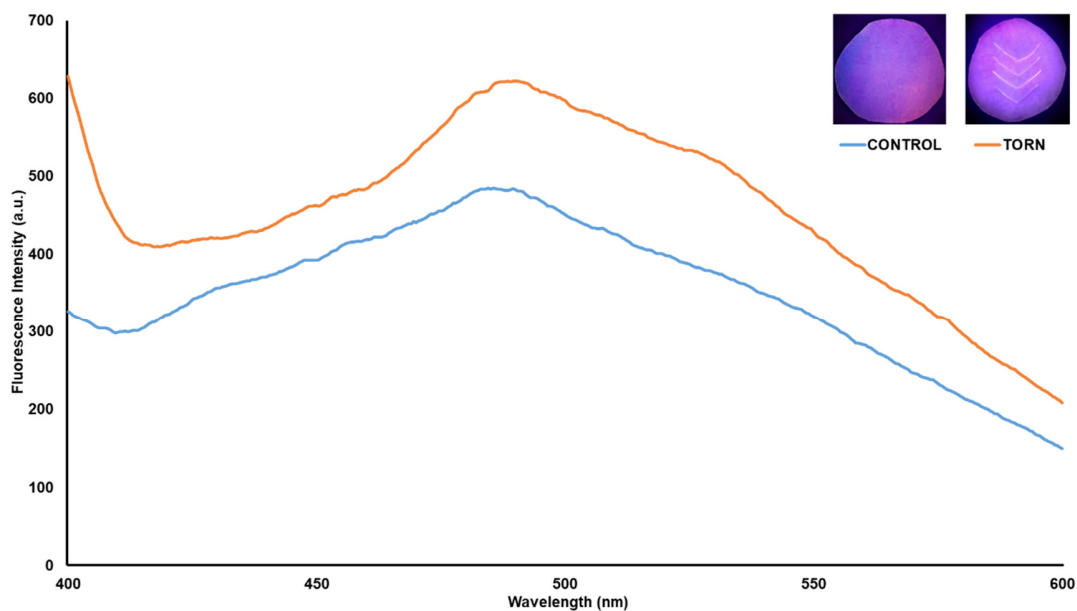

**Figure S1.** Fluorescence emission spectrum from LC1 sample. (inset: NRL-Cur films under UV lamp at 380 nm)

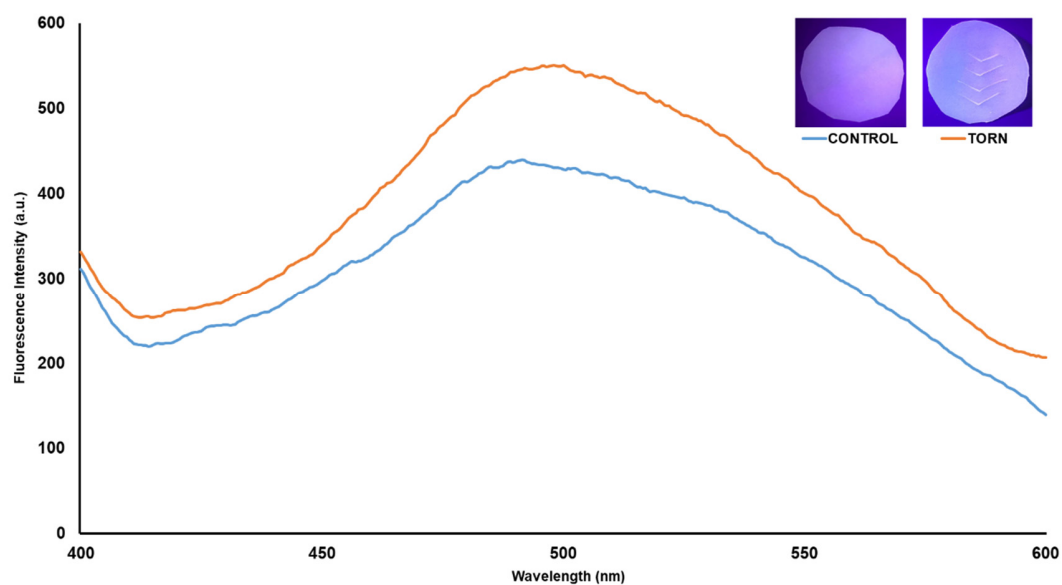

**Figure S2.** Fluorescence emission spectrum from LC2 sample.(inset: LC films under UV lamp at 380 nm)

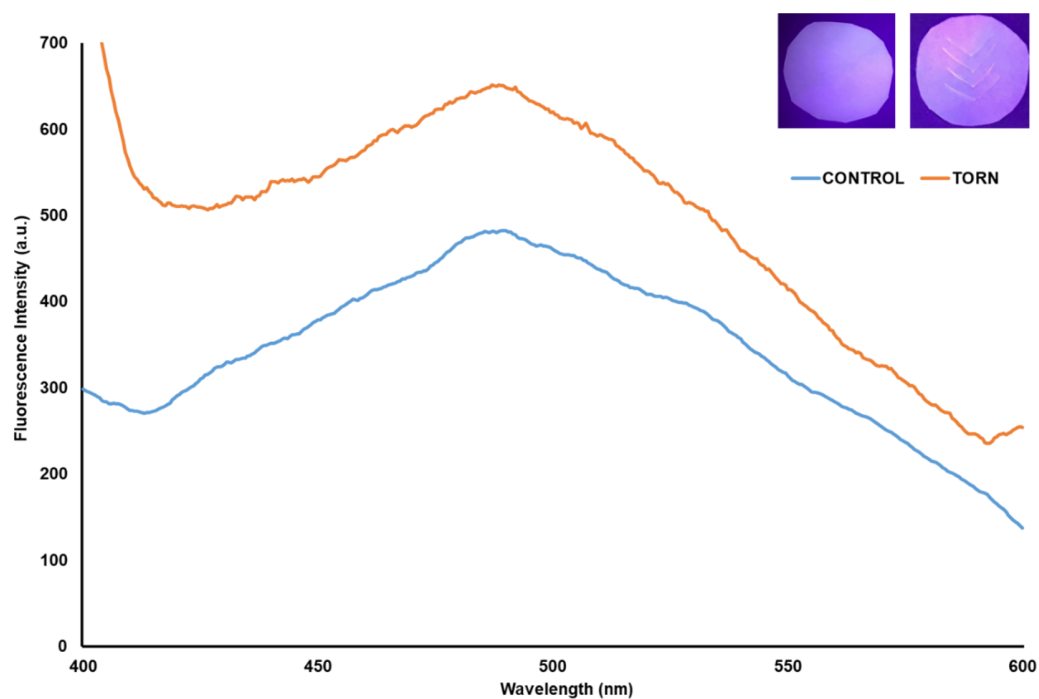

**Figure S3.** Fluorescence emission spectrum from LC3 sample. (inset: NRL-Cur films under UV lamp at 380 nm)

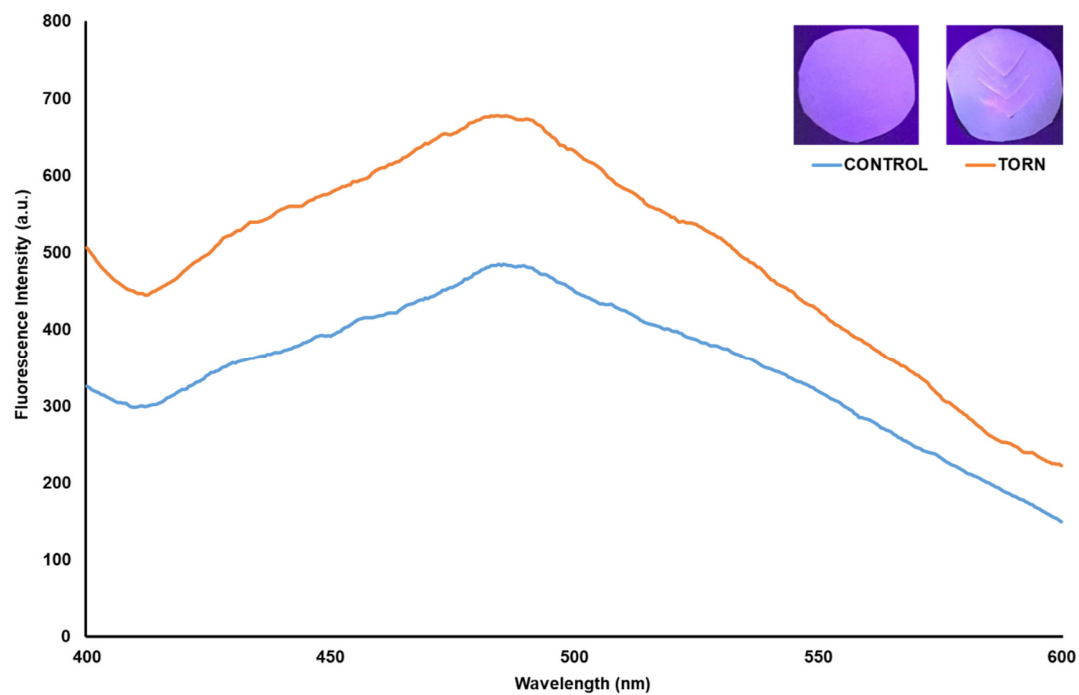

**Figure S4.** Fluorescence emission from LC4 sample. (inset: NRL-Cur films under UV lamp at 380 nm)

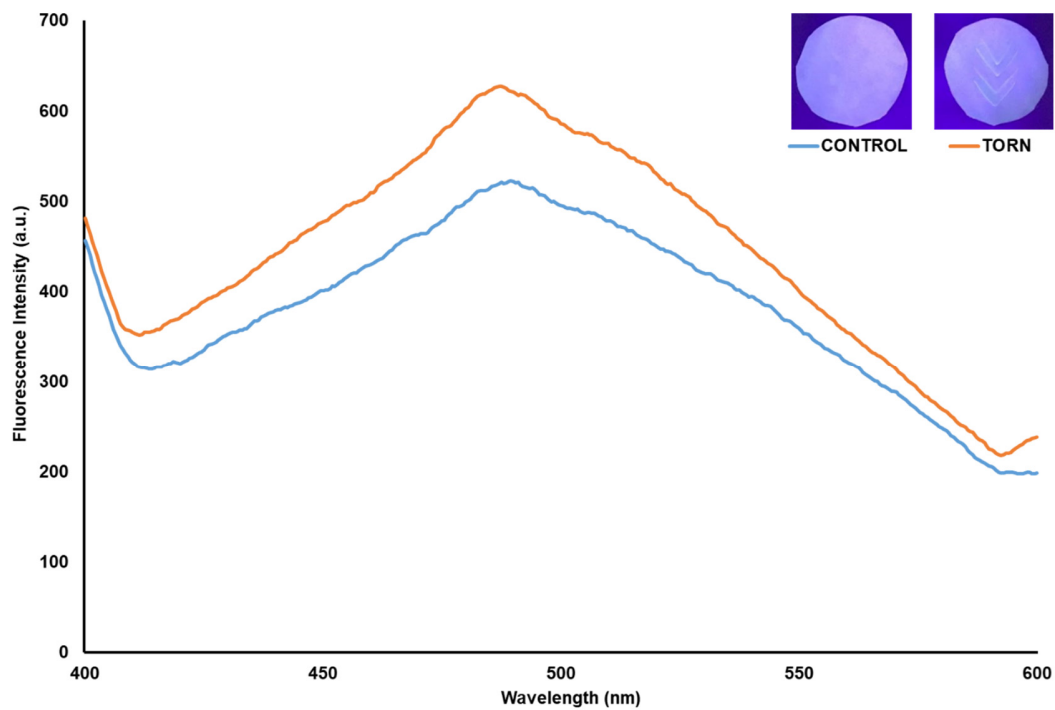

**Figure S5.** Fluorescence emission spectrum from LC5 sample. (inset: NRL-Cur films under UV lamp at 380 nm)

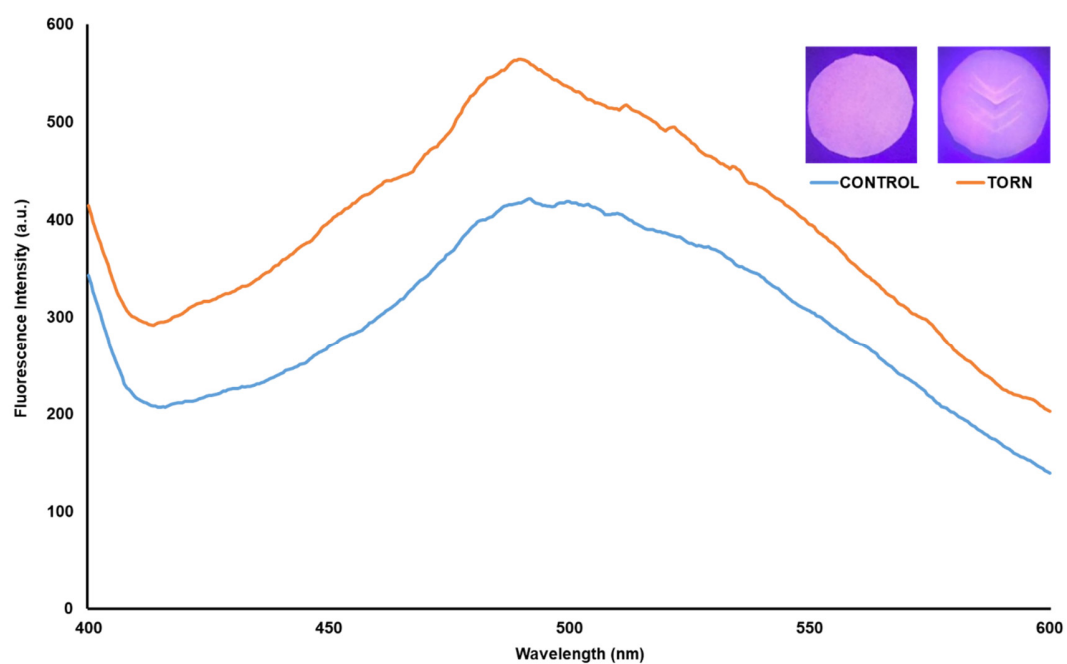

**Figure S6.** Fluorescence emission spectrum from LC6 sample. (inset: NRL-Cur films under UV lamp at 380 nm)

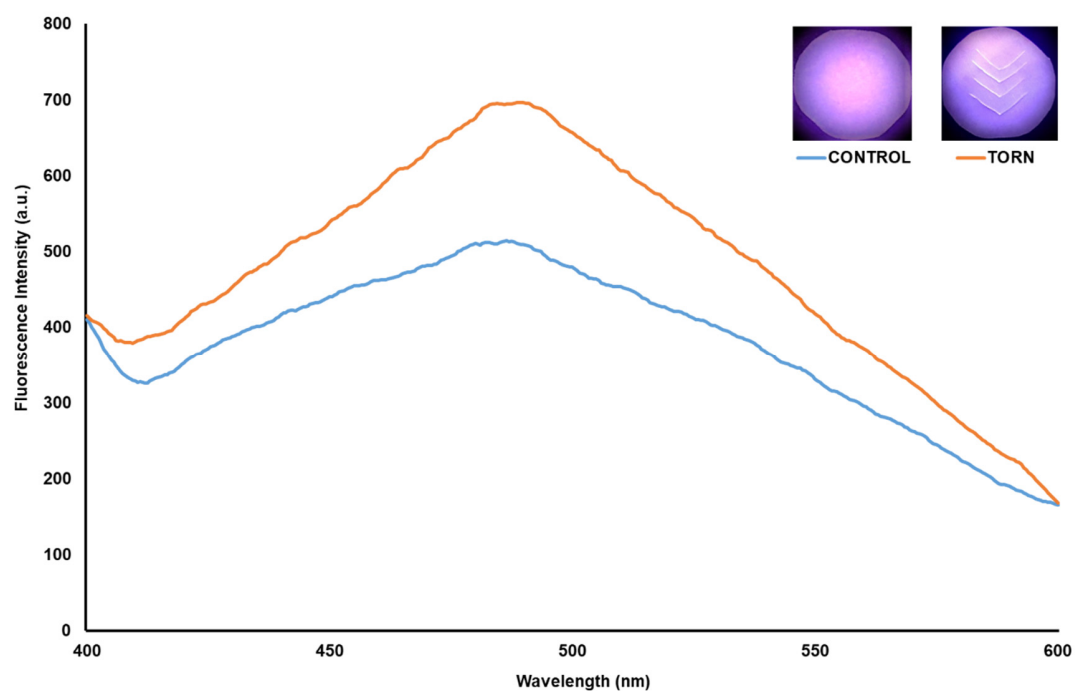

**Figure S7.** Fluorescence emission spectrum from LC7 sample. (inset: NRL-Cur films under UV lamp at 380 nm)

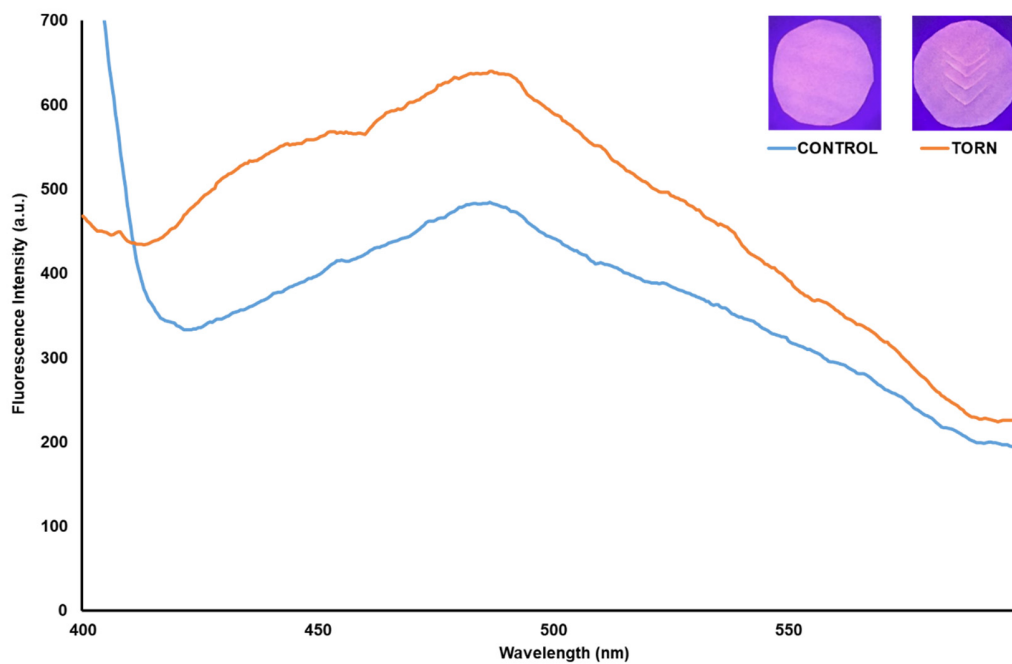

**Figure S8.** Fluorescence emission spectrum from LC8 sample. (inset: NRL-Cur films under UV lamp at 380 nm)

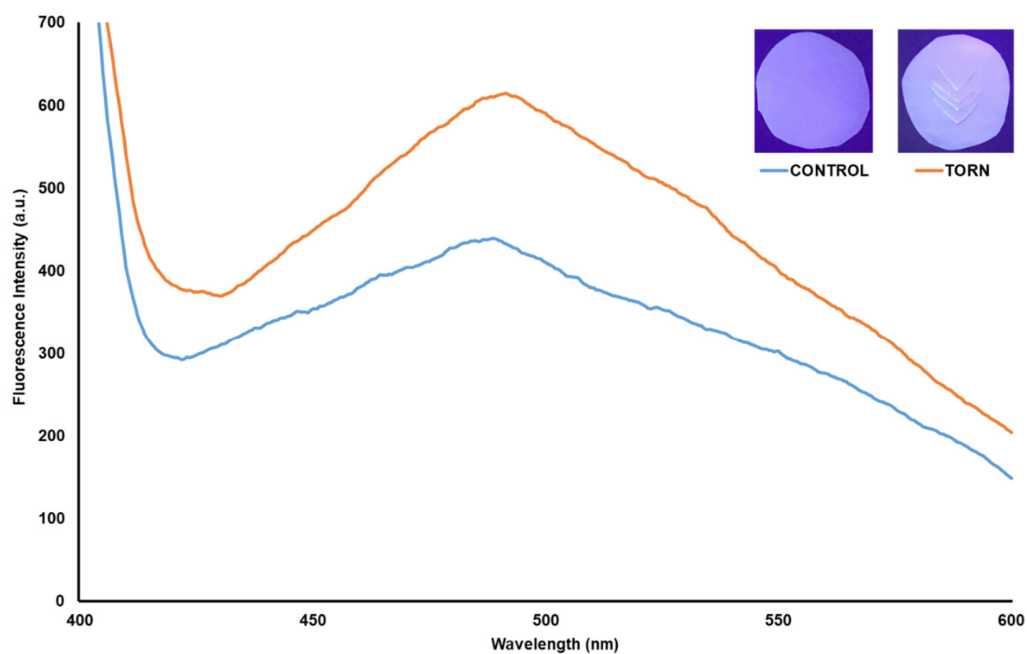

**Figure S9.** Fluorescence emission spectrum from LC9 sample. (inset: NRL-Cur films under UV lamp at 380 nm)

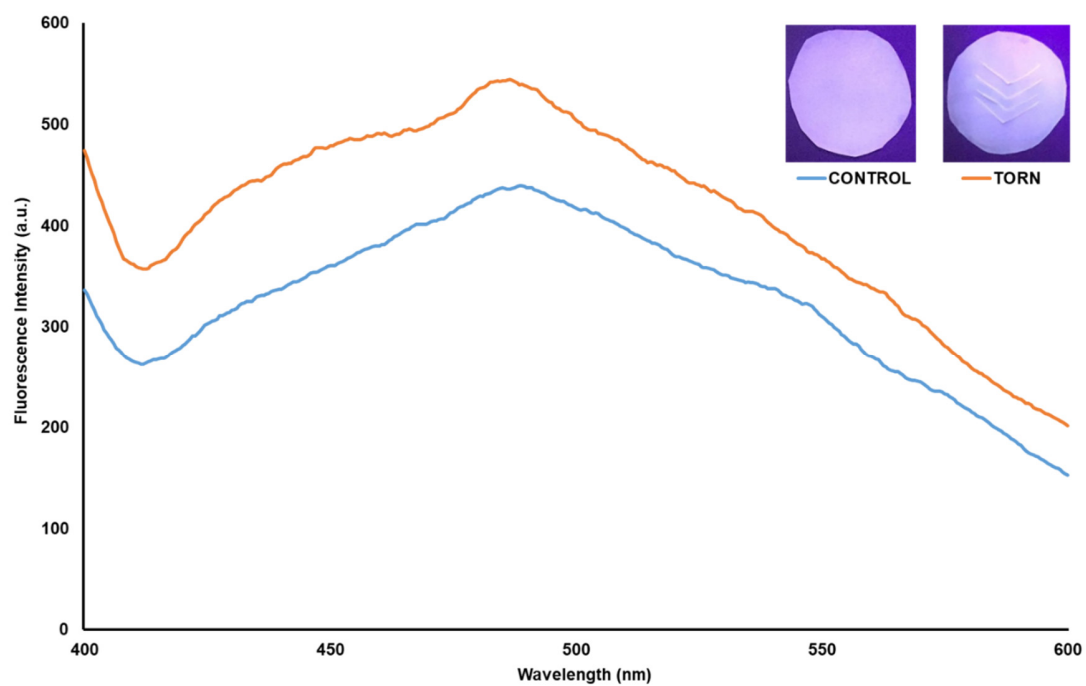

**Figure S10.** Fluorescence emission spectrum from LC10 sample. (inset: NRL-Cur films under UV lamp at 380 nm)
